# Supplementary material for: The Dominance of Severe Acute Respiratory Syndrome Coronavirus 2 B.1.617 and Its Sublineages and Associations with Mortality during the COVID-19 Pandemic in India between 2020 and 2021
Source: PubMed Central journal article supplement (PMC8733510; doi:10.4269/ajtmh.21-0812), 2021-11-17

**Legends for supplementary figures**

**Fig S1. Distribution of most frequently found non-synonymous mutations in the Indian SARS-COV-2**

**Fig. S2. Correspondence analysis showing the dominance of different SARS-COV-2 variants in relation to time**

[*Note: Var-1 = Basal sequences; Var-2 = B.1; Var-3= B.1.1; Var-4=B.1.1.7 and Var-5= B.1.617 and its sub lineages; Q1=Jan-March, 2020; Q2=April-June, 2020; Q3= July-Sept, 2020; Q4= Oct-Dec, 2020; Q5= Jan-March, 2021; Q6=April-May, 2021*]

**Fig. S3. Age distribution of (A) recovered and (B) deceased individuals from different SARS-COV-2 variants**

**Table S1. Age specific differences in the recovery and mortality of patients infected with different SARS-COV-2 variants**

| Variant Type                        | Clinical Outcome                                                                           |        |                    |                                       |        |                    |
|-------------------------------------|--------------------------------------------------------------------------------------------|--------|--------------------|---------------------------------------|--------|--------------------|
|                                     | Age of Recovered                                                                           |        |                    | Age of Deceased                       |        |                    |
|                                     | Mean                                                                                       | Median | Standard Deviation | Mean                                  | Median | Standard Deviation |
| SARS-COV-2 basal variants (N=571)   | 43                                                                                         | 43     | 17                 | 62                                    | 62     | 12                 |
| B.1 (N=147)                         | 48                                                                                         | 49     | 17                 | 61                                    | 64     | 16                 |
| B.1.1 (N=14)                        | 46                                                                                         | 53     | 19                 | 57                                    | 57     |                    |
| B.1.1.7 (N=11)                      | 54                                                                                         | 55     | 16                 | 66                                    | 66     | 29                 |
| B.1.617 and its sub lineages (N=92) | 40                                                                                         | 36     | 16                 | 57                                    | 58     | 14                 |
| Kruskal-Wallis test                 | Test Statistic=14.723<br>p-value=0.005                                                     |        |                    | Test Statistic=2.998<br>p-value=0.558 |        |                    |
| Pairwise Comparisons                | Significant difference between Variants 2 and 5.<br>Test Statistic=3.022,<br>p-value=0.025 |        |                    | NA                                    |        |                    |

**Table S2. Gender-based difference in the risk of COVID-19 mortality**

|                       | Value  | df | Asymptotic Significance (2-sided) | Exact Sig. (2-sided) | Exact Sig. (1-sided) |
|-----------------------|--------|----|-----------------------------------|----------------------|----------------------|
| Pearson Chi-Square    | 2.074a | 1  | 0.15                              |                      |                      |
| Continuity Correction | 1.812  | 1  | 0.178                             |                      |                      |
| Likelihood Ratio      | 2.037  | 1  | 0.153                             |                      |                      |
| Fisher's Exact Test   |        |    |                                   | 0.158                | 0.09                 |

**Table S3. Odds ratio of all possible combinations indicating the chances of mortality against recovery from COVID-19 infection**

| <b>Combinations</b>                                                | <b>Odds Ratio</b> |
|--------------------------------------------------------------------|-------------------|
| Base Category (Basal Variant, Female, Age_ $\leq$ 44) or Intercept | 0.030             |
| Basal Variant, Female, Age_ $\geq$ 45_ $\leq$ 64                   | 10.335            |
| Basal Variant, Female, Age_ $\geq$ 65                              | 23.346            |
| Basal Variant, Male, Age_ $\leq$ 44                                | 0.983             |
| Basal Variant, Male, Age_ $\geq$ 45_ $\leq$ 64                     | 11.288            |
| Basal Variant, Male, Age_ $\geq$ 65                                | 24.299            |
| B.1, Female, Age_ $\leq$ 44                                        | 0.549             |
| B.1, Female, Age_ $\geq$ 45_ $\leq$ 64                             | 10.854            |
| B.1, Female, Age_ $\geq$ 65                                        | 23.865            |
| B.1, Male, Age_ $\leq$ 44                                          | 1.502             |
| B.1, Male, Age_ $\geq$ 45_ $\leq$ 64                               | 11.807            |
| B.1, Male, Age_ $\geq$ 65                                          | 24.818            |
| B.1.1, Female, Age_ $\leq$ 44                                      | 0.344             |
| B.1.1, Female, Age_ $\geq$ 45_ $\leq$ 64                           | 10.649            |
| B.1.1, Female, Age_ $\geq$ 65                                      | 23.660            |
| B.1.1, Male, Age_ $\leq$ 44                                        | 1.297             |
| B.1.1, Male, Age_ $\geq$ 45_ $\leq$ 64                             | 11.602            |
| B.1.1, Male, Age_ $\geq$ 65                                        | 24.613            |
| B.1.1.7, Female, Age_ $\leq$ 44                                    | 0.788             |
| B.1.1.7, Female, Age_ $\geq$ 45_ $\leq$ 64                         | 11.092            |
| B.1.1.7, Female, Age_ $\geq$ 65                                    | 24.103            |
| B.1.1.7, Male, Age_ $\leq$ 44                                      | 1.740             |
| B.1.1.7, Male, Age_ $\geq$ 45_ $\leq$ 64                           | 12.045            |
| B.1.1.7, Male, Age_ $\geq$ 65                                      | 25.056            |
| B.1.617, Female, Age_ $\leq$ 44                                    | 5.849             |
| B.1.617, Female, Age_ $\geq$ 45_ $\leq$ 64                         | 16.154            |
| B.1.617, Female, Age_ $\geq$ 65                                    | 29.165            |
| B.1.617, Male, Age_ $\leq$ 44                                      | 6.802             |
| B.1.617, Male, Age_ $\geq$ 45_ $\leq$ 64                           | 17.107            |
| B.1.617, Male, Age_ $\geq$ 65                                      | 30.118            |

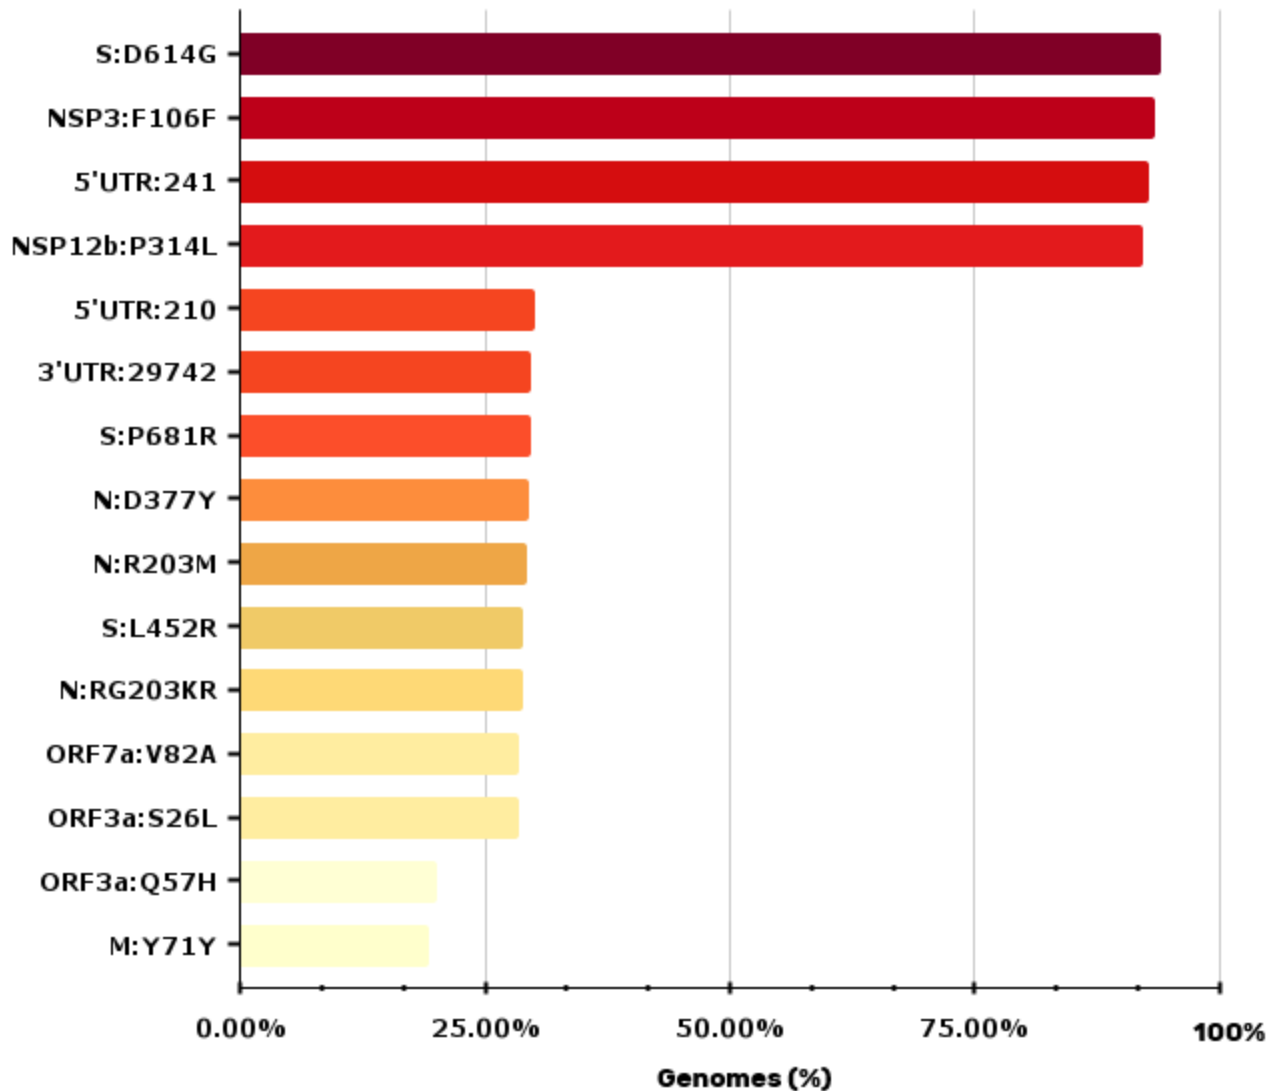

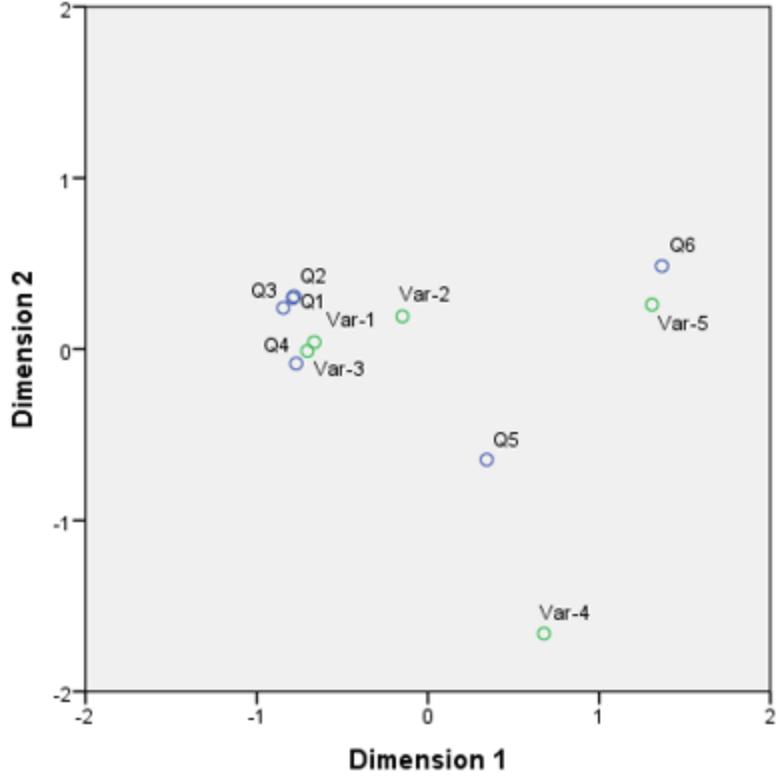

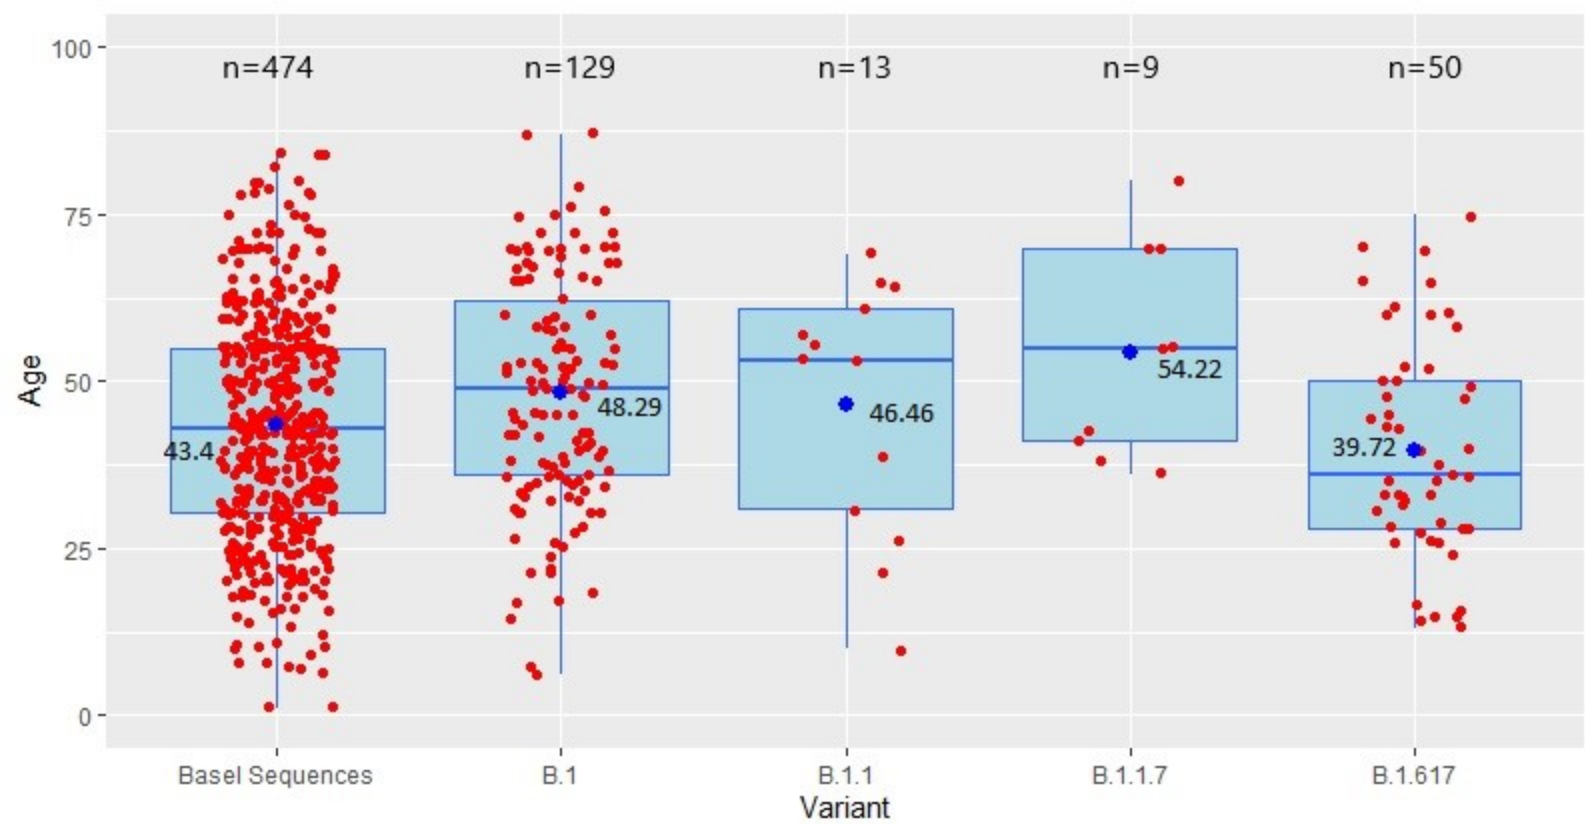

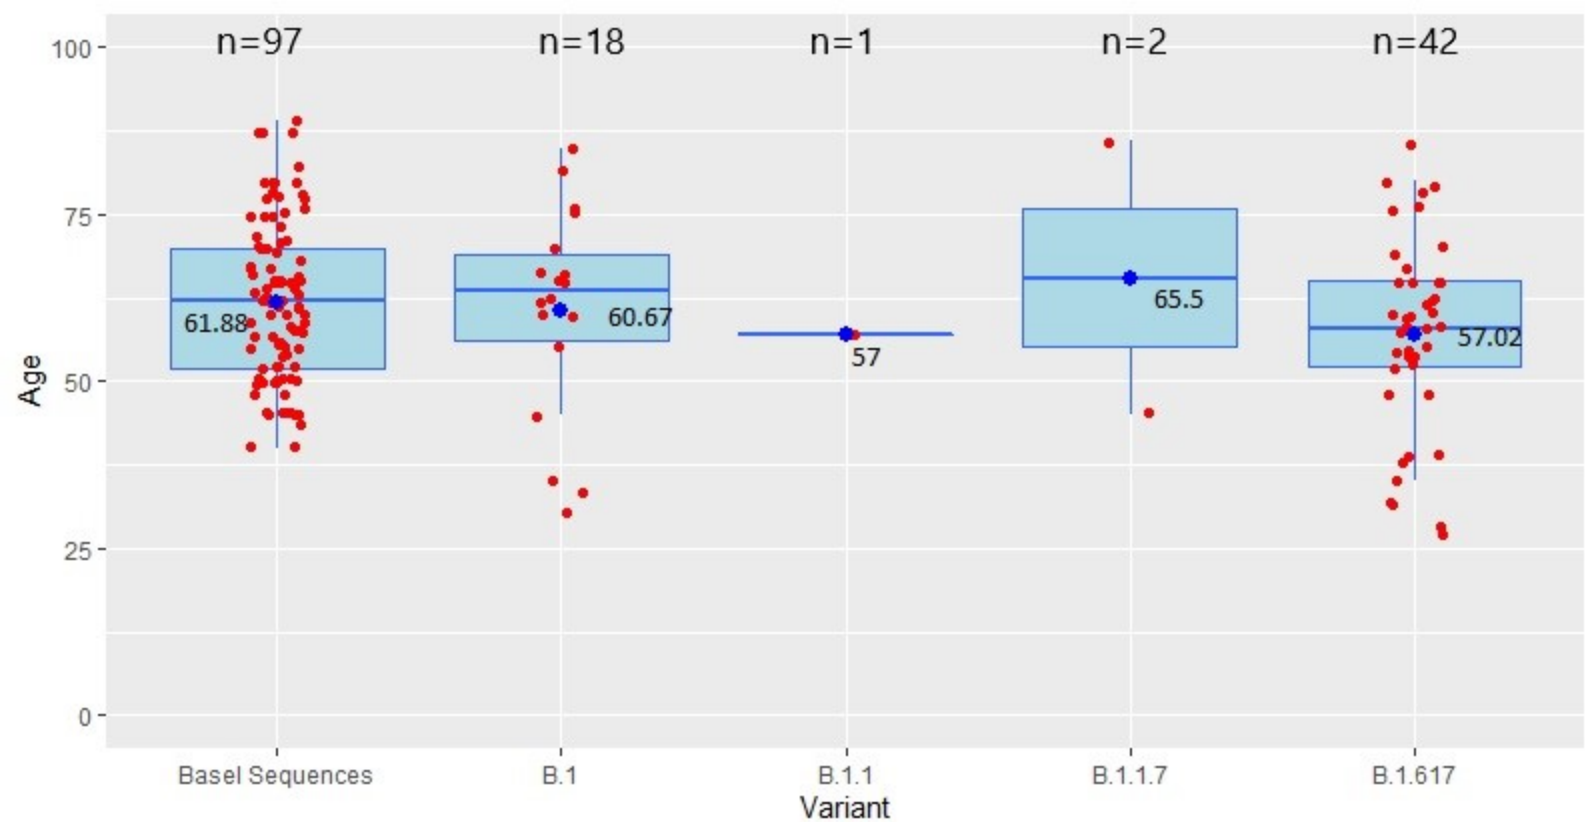

Supplement: tpmd210812.SD1.pdf [file tpmd210812.SD1.pdf]
